# Supplementary material for: Exploiting the UV excited size-dependent emission of PDMS-coated CdTe quantum dots for in vitro simultaneous multicolor imaging of HepG2 cellular organelles
Source: Royal Society of Chemistry journal article supplement (doi:10.1039/d2ma00964a), 2023-01-01
Supplement: d2ma00964a1.pdf [file d2ma00964a1.pdf]

Exploiting the UV excited size-dependent emission of polymer-coated quantum dots for *in-vitro* simultaneous multicolor imaging

Sulaxna Pandey <sup>a,b</sup>, and Dhananjay Bodas <sup>a,b,\*</sup>

<sup>a</sup> Nanobioscience Group, Agharkar Research Institute, GG Agarkar road, Pune 411 004 India

<sup>b</sup> Savitribai Phule Pune University, Ganeshkhind Road, Pune 411 007 India

\* [dsbodas@aripune.org](mailto:dsbodas@aripune.org)

#### 4 color multicolor bioimaging

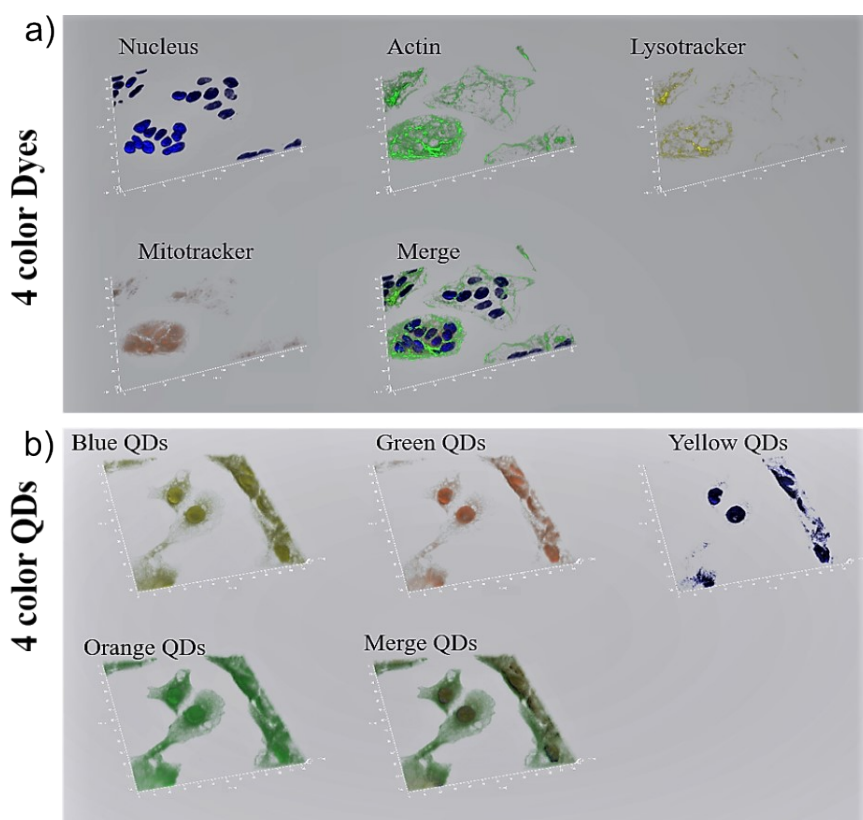

Figure. S1: 3D depth profiling confocal microscopy images of HepG2 cellular organelles treated with commercial dyes and PQDs.
